# Supplementary material for: Comparison of the Fecal Bacteriome of HIV-Positive and HIV-Negative Older Adults
Source: MDPI journal article supplement (doi:10.3390/biomedicines11082305), 2023-08-19
Supplement: s1 [file s1]

**Table S1.** Alpha and beta diversity in the fecal samples of the patients of the PWH groups according to other variables assessed in this study.

| Variables                                                                                                                                                              | Samples (n) | Shannon*         | Bray-Curtis** | Jaccard** |
|------------------------------------------------------------------------------------------------------------------------------------------------------------------------|-------------|------------------|---------------|-----------|
| <b>Depression</b>                                                                                                                                                      |             |                  |               |           |
| No-drepression                                                                                                                                                         | 17          | 3.59 (3.44-3.69) | -             | -         |
| Depression                                                                                                                                                             | 7           | 3.29 (3.23-3.66) | -             | -         |
| p-values                                                                                                                                                               | -           | 0.26             | 0.3           | 0.39      |
| <b>Nadir</b>                                                                                                                                                           |             |                  |               |           |
| Nadir≥200                                                                                                                                                              | 8           | 3.66 (3.48-3.79) | -             | -         |
| Nadir<200                                                                                                                                                              | 16          | 3.51 (3.32-3.62) | -             | -         |
| p-values                                                                                                                                                               | -           | 0.32             | 0.65          | 0.36      |
| <b>Walking speed</b>                                                                                                                                                   |             |                  |               |           |
| <0.8 m/sg                                                                                                                                                              | 3           | 3.59 (3.55-3.6)  | -             | -         |
| 0.8 – 1.2 m/sg                                                                                                                                                         | 3           | 3.23 (3.19-3.26) | -             | -         |
| >1.2 m/sg                                                                                                                                                              | 18          | 3.62 (3.41-3.71) | -             | -         |
| p-values                                                                                                                                                               | -           | 0.06             | 0.32          | 0.19      |
| <b>SPPB</b>                                                                                                                                                            |             |                  |               |           |
| ≤6 points                                                                                                                                                              | 3           | 3.59 (3.41-3.61) | -             | -         |
| 7-9 points                                                                                                                                                             | 3           | 3.51 (3.32-3.68) | -             | -         |
| ≥10 points                                                                                                                                                             | 18          | 3.66 (3.4-3.74)  | -             | -         |
| p-values                                                                                                                                                               | -           | 0.67             | 0.24          | 0.19      |
| <b>Polypharmacy</b>                                                                                                                                                    |             |                  |               |           |
| No polypharmacy                                                                                                                                                        | 12          | 3.52 (3.32-3.65) | -             | -         |
| Yes polypharmacy                                                                                                                                                       | 12          | 3.56 (3.44-3.7)  | -             | -         |
| p-values                                                                                                                                                               | -           | 0.89             | 0.31          | 0.35      |
| *Wilcoxon-Mann-Whitney test for variables with 2 factors (depression, Nadir, polypharmacy) and Kruskal-Wallis test for variables with 3 factors (walking speed, SPPB). |             |                  |               |           |
| ** PERMANOVA test with 999 permutations.                                                                                                                               |             |                  |               |           |
